# Supplementary material
Source: Springer Nature journal article supplement (https://www.springermedizin.de/resource/supplementary/13569_2012_34_MOESM2_ESM.pdf/9676650)

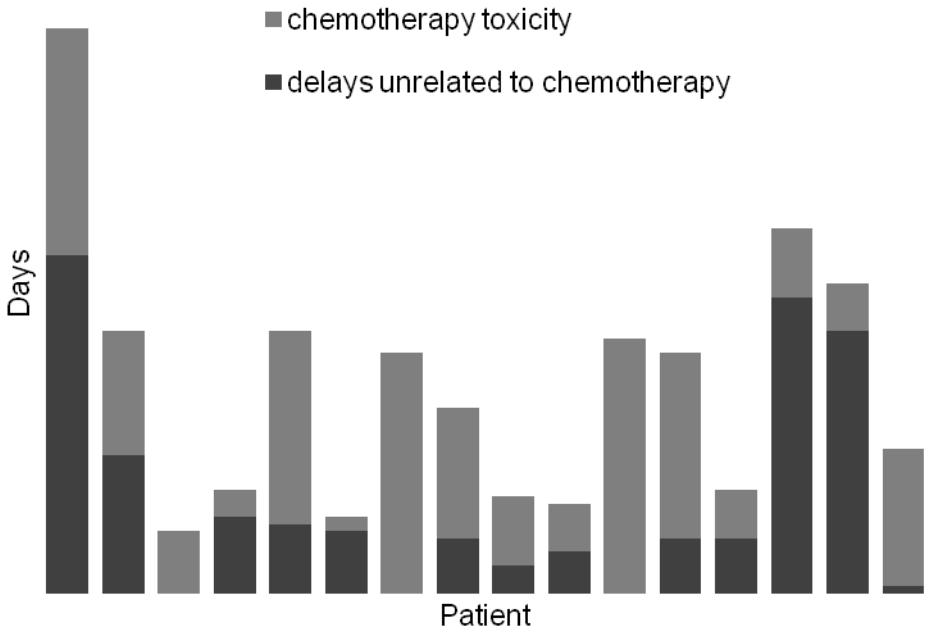

Supplement: MOESM2 [file 9676650]
